# Supplementary material for: Measurement Report: Observations of Ground-Level Ozone Concentration Gradients Perpendicular to the Lake Ontario Shoreline
Source: Copernicus journal article supplement (doi:10.5194/egusphere-2023-1751), 2023-10-06
Supplement: Supplementary file [file egusphere-2023-1751-AC1-supplement.pdf]

## Response to Reviewer #1

We want to thank Reviewer 1 for their careful reading of the manuscript and the useful and insightful suggestions. The revised version has been substantially improved, we think, by addressing these concerns. The major suggestion was that we should properly consider local meteorological effects in our discussion of the steep near-shore ozone gradients. We have done so in the revised version, with a substantially rewritten discussion and some further clarification of our measurements. We now conclude that a near-shore concentration gradient is to be expected (and is generally seen) due to the rapid increase in the boundary layer height, moving inshore from the lake (or an ocean). This is further expected due to the “lake breeze” effect, generally observed during the summer measurement period. Interestingly, there is no such lake breeze in winter, where the gradients persist. The differences we observe between the Oshawa and Toronto gradients, and the seasonality we see in Oshawa, are perhaps best explained by differences in the ozone dry deposition rates near the shorelines.

We have included sea breeze along with lake breeze effects in our analysis, augmenting the citation list accordingly.

Below we list the specifics of the changes to the manuscript in the revised version.

Major comments:

- Many lake breeze related papers were cited, but papers relating to sea and bay breezes, which are essentially the same phenomenon as lake breezes, were ignored. I suggest the authors provide more background material relating to recent studies involving gradients in air pollution near coastal areas.
  - Added to introduction references to studies by Han et al., (2023) in Hangzhou, China, Zhang et al., (2020) in Long Island, New York, United States, Finardi et al., (2018) in Naples, Italy, and Stauffer & Thompson, (2015) in Chesapeake Bay, United States.
  - Added in results section comparisons to measured ozone gradients at land-sea boundaries.
    - Zhang et al., (2020) in Long Island, New York, USA measured surface ozone gradients of 18 ppb km<sup>-1</sup> and 15 ppb km<sup>-1</sup> respectively on two case study days in around 2 km distance.
    - Geddes et al., (2021) measured gradients of Ox (NO<sub>2</sub> + O<sub>3</sub>) greater than 30 ppb in 15 km during sea breeze days in Boston, New England, United States.

Han, Z. S., Liu, H. N., Yu, B., & Wang, X. Y. (2023). The effects of coastal local circulations and their interactions on ozone pollution in the Hangzhou metropolitan area. *Urban Climate*, 48, 101417. <https://doi.org/10.1016/j.uclim.2023.101417>

Geddes, J. A., Wang, B., & Li, D. (2021). Ozone and Nitrogen Dioxide Pollution in a Coastal Urban Environment: The Role of Sea Breezes, and Implications of Their Representation for Remote Sensing of Local Air Quality. *Journal of Geophysical Research: Atmospheres*, 126(18). Scopus. <https://doi.org/10.1029/2021JD035314>

Zhang, J., Ninneman, M., Joseph, E., Schwab, M. J., Shrestha, B., & Schwab, J. J. (2020). Mobile Laboratory Measurements of High Surface Ozone Levels and Spatial Heterogeneity During LISTOS 2018: Evidence for Sea Breeze Influence. *Journal of Geophysical Research: Atmospheres*, 125(11), e2019JD031961. <https://doi.org/10.1029/2019JD031961>

Finardi, S., Agrillo, G., Baraldi, R., Calori, G., Carlucci, P., Ciccio, P., D'Allura, A., Gasbarra, D., Gioli, B., Magliulo, V., Radice, P., Toscano, P., & Zaldei, A. (2018). Atmospheric Dynamics and Ozone Cycle during Sea Breeze in a Mediterranean Complex Urbanized Coastal Site. *Journal of Applied Meteorology and Climatology*, 57(5), 1083–1099. <https://doi.org/10.1175/JAMC-D-17-0117.1>

Stauffer, R. M., & Thompson, A. M. (2015). Bay breeze climatology at two sites along the Chesapeake bay from 1986–2010: Implications for surface ozone. *Journal of Atmospheric Chemistry*, 72(3), 355–372. <https://doi.org/10.1007/s10874-013-9260-y>

- Is the “lake-edge removal effect” a common term? If not, I recommend not using it. It sounds like the lake edge is removing ozone, but I don't think that is what is happening.
  - This term was used, and seems to only have been used, by Blanchard & Aherne (2019) to describe the steeper gradient that occurred around 1 km in addition to a general gradient that occurs with distance to shore at greater resolutions > 1 km.
  - We used this term to differentiate between the two observations and believe it sufficiently describes the removal of ozone observed.

Blanchard, D., & Aherne, J. (2019). Spatiotemporal variation in summer ground-level ozone in the Sandbanks Provincial Park, Ontario. *Atmospheric Pollution Research*, 10(3), 931–940. <https://doi.org/10.1016/j.apr.2019.01.001>

- The authors hypothesize that the observed ozone gradient is primarily due to deposition and chemistry. There are other contributing factors. I strongly suggest the authors review the following paper that discusses sharp gradients in concentrations and deposition of nitrogen species along coastlines (Loughner, C.P., M. Tzortziou, S. Shroder, and K.E. Pickering (2016), Enhanced dry deposition of nitrogen pollution near coastlines: A case study covering the Chesapeake Bay estuary and Atlantic Ocean coastline, *Journal of Geophysical Research – Atmospheres*, 121, 14,221-14,238.). The gradient in boundary layer height near the coastline may be a large contributing factor in the observed ozone gradient, but boundary layer height was not mentioned in the manuscript. While ozone titration might be occurring, there is no evidence provided that it is.
  - Ozone titration hypothesis has been removed due to lack of measurement of NO<sub>2</sub> and other means of evidence. In particular, we did not measure ozone in winter further than 1 km distances to confirm that levels in Toronto will increase again.
  - We discuss the impact of boundary layer height changes near the coastline in relation to ozone gradients and include the paper listed. We will also include the boundary layer height changes in Toronto as modelled by Stroud et al., (2020)
    - On 28 July 2015 around 5:00 PM local time, the mixing length at the surface increases from around 1-3 m on the lake to 70-100 m in around 1 km distance in downtown Toronto. After this point, the model shows a uniformly well-mixed convection up to 2.3 km altitude. This suggests the origin of the steeper

gradient or lake-edge removal is largely influenced by this growth in boundary layer height.

- However, assuming the boundary layer height changes uniformly along the lake, this does not account for the differences between cities. Seasonal changes in boundary layer height should also reduce the ozone gradient in winter for both cities and is not observed in Toronto. We hypothesize that changes in deposition are related to the differences in ozone gradient between the two cities and their seasonal changes in ozone gradient slope.

Stroud, C., Ren, S., Zhang, J., Moran, M., Akingunola, A., Makar, P., Munoz-Alpizar, R., Leroyer, S., Bélair, S., Sills, D., & Brook, J. (2020). Chemical Analysis of Surface-Level Ozone Exceedances during the 2015 Pan American Games. *Atmosphere*, 11(6), 572. <https://doi.org/10.3390/atmos11060572>

- I think the analysis would benefit if the analyzed gradients in observed ozone concentrations were performed separately based on wind direction (onshore vs offshore flow). When the winds are onshore, the gradient may primarily be due to the gradient in boundary layer height. When there is offshore flow, the gradient may be just due to the coastline being downwind of emissions of ozone precursors from the urban area.
  - Wind direction was presented using wind rose plots for summer and winter in Toronto and Oshawa where data was collected. The presence of onshore flow in summer versus not present or offshore in winter was discussed.
  - We include assessment of lake-breeze days following criteria by Laird et al., (2001) that has also been previously used by Wentworth et al., (2015) to identify lake-breeze circulation in Toronto.
    - All days in Toronto were positive for lake-breeze except for August 2, 2023. This is incidentally also the day when the slope was the lowest,  $-0.0086$  ppb/m, and our own measured wind directions were sporadic with no trend.
    - A z-score of  $+0.928$  and Grubbs' outlier test ( $\alpha = 0.050$ ), however, does not show that this is a significantly lower value.
    - The same program was also run on Toronto winter values that resulted in one positive for February 12, 2023. The slope was on the steeper end but not the highest recorded.
  - We also assessed lake-breeze in Oshawa using the same method. No appropriate lake meteorological station with accessible data was available so the same station in Toronto was used.
    - All days showed lake-breeze except for June 10<sup>th</sup>, 2022. The slope on this day was below the mean but not the minimum.
    - Winter had no positives.

Laird, N. F., Kristovich, D. A. R., Liang, X.-Z., Arritt, R. W., & Labas, K. (2001). Lake Michigan Lake Breezes: Climatology, Local Forcing, and Synoptic Environment. *Journal of Applied Meteorology*, 40(3), 409–424. [https://doi.org/10.1175/1520-0450\(2001\)040<0409:LMLBCL>2.0.CO;2](https://doi.org/10.1175/1520-0450(2001)040<0409:LMLBCL>2.0.CO;2)

Wentworth, G. R., Murphy, J. G., & Sills, D. M. L. (2015). Impact of lake breezes on ozone and nitrogen oxides in the Greater Toronto Area. *Atmospheric Environment*, 109, 52–60. <https://doi.org/10.1016/j.atmosenv.2015.03.002>

- Combining this analysis with PBL height calculated from a NWP model would benefit this manuscript.
  - As mentioned previously, boundary layer from Toronto is inferred from model results from the Stroud et al., (2020) paper.

Minor comments:

- Lines 9-10: In addition to considering removing “lake-edge removal effect” here and throughout the paper (see comment above), I suggest changing “where ozone concentration decreases within the first 500 m to 1 km perpendicular to the lake” to “where ozone concentration decreases with distance from the lake within the first 500 m to 1 km” to make sure the reader understands you see this gradient near the coastline onshore and not just offshore.
- Line 27: change “airflow moving” to “airflow near the surface moving”
- Lines 30-31: end sentence after “lake” and delete the remainder of the sentence.
- Line 31: This sentence refers to a land breeze the figure shows a lake breeze.
- Line 32: change “ozone concentration” to “ozone and ozone precursor concentrations”
- Line 33: change “O3 inland” to “O3 and O3 precursors inland”
- Line 47: change “lake-breeze” to “lake-breezes”
- Line 53: change “lake breeze was” to “lake breezes were”
- Line 61: change “further” to “farther”

The revised text has incorporated all these suggestions.
