# Supplementary material for: Measurement Report: Observations of Ground-Level Ozone Concentration Gradients Perpendicular to the Lake Ontario Shoreline
Source: Copernicus journal article supplement (doi:10.5194/egusphere-2023-1751), 2023-10-06
Supplement: Supplementary file [file egusphere-2023-1751-AC3-supplement.pdf]

We want to thank both Reviewers for their careful reading of the manuscript and the useful and insightful suggestions. The revised version has been substantially improved, we think, by addressing these concerns. We have posted detailed responses to both as replies to their comments.

The major improvements have been to consider local meteorological effects in our discussion of the steep near-shore ozone gradients. We have substantially rewritten the discussion to do so, and have also added further clarification of our measurements. We now conclude that a near-shore concentration gradient is to be expected (and is generally seen) due to the rapid increase in the boundary layer height, moving inshore from the lake (or an ocean). This is further expected due to the “lake breeze” effect, generally observed during the summer measurement period. Interestingly, there is no such lake breeze in winter, where the gradients persist. The differences we observe between the Oshawa and Toronto gradients, and the seasonality we see in Oshawa, are perhaps best explained by differences in the ozone dry deposition rates near the shorelines.

All minor corrections and suggestions made by both reviewers have been incorporated into the revised version.
